# Supplementary material
Source: publisher figshare collection journal article supplement (https://tandf.figshare.com/ndownloader/files/40911312)
Supplement: Supplementary file 1 [file 40911312]

**Figure Caption List**

Figure 1. With (a) the location of the Blackwater catchment and (b) digital elevation model of the Blackwater catchment, river network, and locations of Sites 1-4.

Figure 2. With (a) installation of riverbank stabilisation techniques at Site 3 in September 2020, (b) close-up of coir matting, tree stems, and cobblestone backfill used to support the structure, and (c) rock armouring along riverbank B for Site 2 in November 2021.

Figure 3. (a-d) Bulk density sampling locations at Sites 1-4 displayed over summer 2020 drone imagery and upstream and downstream grab sampling points. The predominant flow direction is indicated by an arrow.

Figure 4. Identified erosion zones using image differencing and zonal statistics in ArcGIS displayed over the summer of 2020 drone imagery of Site 4.

Figure 5. Comparison between the spatial variation in the magnitude of erosion and deposition as a rate per pixel in ArcMap for Site 3 before and after the introduction of riverbank stabilisation techniques. Darker colours represent higher erosion and deposition occurrence and lighter colours represent lower erosion and deposition occurrence.

Figure 6. Time series plots of observed discharge in m3 s-1 (top), Total Suspended Sediment (TSS) in mg L-1 (middle), and Total Phosphorus (TP) in µg L-1 (bottom) at the downstream sampling locations of Sites 1-4.
